# Supplementary material for: Chemometric Analysis of Fatty Acids Profile of Ripening Chesses
Source: PubMed Central journal article supplement (PMC7221737; doi:10.3390/molecules25081814), 2020-04-15
Supplement: molecules-25-01814-s001.pdf [file molecules-25-01814-s001.pdf]

# Chemometric Analysis of Fatty Acids Profile of Ripening Chesses

Agnieszka Białek <sup>1,\*</sup>, Małgorzata Białek <sup>1,2,\*</sup>, Tomasz Lepionka <sup>3</sup>, Małgorzata Czerwonka <sup>4</sup> and Marian Czauderna <sup>2</sup>

- <sup>1</sup> Department of Animal Improvement and Nutrigenomics, Institute of Genetics and Animal Breeding, Polish Academy of Sciences, Postępu 36A Jastrzębiec, 05-552 Magdalenka, Poland
- <sup>2</sup> The Kielanowski Institute of Animal Physiology and Nutrition, Polish Academy of Sciences, Instytutcka 3, 05-110 Jabłonna, Poland; mr.czauderna@gmail.com
- <sup>3</sup> Laboratory of Hygiene, Food and Nutrition, Military Institute of Hygiene and Epidemiology, Kozielska 4, 01-163 Warsaw, Poland; tomasz.lepionka@wihe.pl
- <sup>4</sup> Department of Bromatology, Medical University of Warsaw, Banacha 1, 02-097 Warsaw, Poland; malgorzata.czerwonka@wum.edu.pl
- \* Correspondence: a.bialek@ighz.pl (A.B.); m.bialek@ifzz.pl (M.B.); Tel.: +48-22-736-7128 (A.B.); +48-22-765-3350 (M.B.)

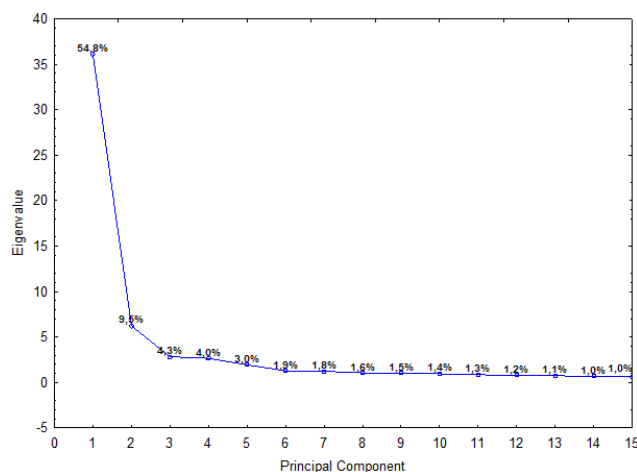

Figure S1. Scree plot of principal components.

Table S1. The matrix of factor analysis structure.

|          | PC1 54.8% | PC2 9.5% | PC3 4.3% | PC4 4.0% |
|----------|-----------|----------|----------|----------|
| CFA      | -0.8652   | -0.2092  | 0.0360   | 0.2682   |
| CD       | -0.8376   | -0.3304  | -0.0391  | 0.1939   |
| c9t11CLA | -0.6886   | -0.1855  | 0.1121   | 0.2590   |
| C6:0     | -0.8389   | -0.3437  | -0.0659  | 0.1828   |
| C13:0    | -0.8180   | -0.3607  | -0.0515  | 0.1893   |
| i-C14:0  | -0.9135   | 0.1848   | 0.0961   | 0.0372   |
| C14:0    | -0.9069   | 0.2164   | 0.0902   | -0.0053  |
| c9C14:1  | -0.9491   | 0.1785   | 0.1243   | -0.0228  |
| a-C15:0  | -0.8757   | 0.0452   | -0.2985  | -0.0703  |
| C15:0    | -0.6063   | -0.4457  | -0.0058  | -0.1082  |
| i-C16:0  | -0.9508   | 0.1645   | 0.1249   | -0.0071  |

|                       |                |                |                |                |
|-----------------------|----------------|----------------|----------------|----------------|
| C16:0                 | <b>-0.7967</b> | 0.2410         | 0.0141         | -0.0949        |
| c7C16:1               | <b>-0.7889</b> | 0.2172         | 0.0090         | -0.0171        |
| c9C16:1               | <b>-0.9518</b> | 0.1646         | 0.1329         | -0.0516        |
| i-C17:0               | <b>-0.9279</b> | 0.1675         | 0.0833         | 0.0471         |
| C17:0                 | <b>-0.9398</b> | 0.1412         | 0.1436         | -0.0089        |
| c9C17:1               | <b>-0.9452</b> | 0.1074         | 0.0995         | 0.0386         |
| C18:0                 | <b>-0.9544</b> | 0.1051         | 0.1435         | -0.0538        |
| t9C18:1               | <b>-0.8657</b> | 0.1462         | 0.1060         | -0.1638        |
| t11C18:1              | <b>-0.9437</b> | 0.1523         | 0.1152         | -0.1331        |
| c6C18:1               | <b>-0.8635</b> | 0.1133         | 0.0570         | -0.0593        |
| c7C18:1               | <b>-0.9474</b> | 0.0933         | 0.1531         | -0.0296        |
| c9C18:1               | <b>-0.9388</b> | 0.0416         | 0.1196         | -0.0165        |
| c9c12C18:2            | <b>-0.9109</b> | 0.0076         | 0.1572         | -0.1010        |
| c9c12c15C18:3         | <b>-0.9106</b> | 0.0901         | 0.1267         | -0.0167        |
| c9t11C18:2            | <b>-0.9460</b> | 0.0112         | 0.1564         | -0.0282        |
| SFA                   | <b>-0.8467</b> | 0.0457         | 0.1165         | -0.1274        |
| MUFA                  | <b>-0.8630</b> | 0.0222         | 0.0563         | -0.0936        |
| PUFA                  | <b>-0.7937</b> | -0.2599        | -0.4334        | 0.1361         |
| n3PUFA                | <b>-0.8990</b> | -0.0043        | -0.1567        | -0.1735        |
| n6PUFA                | <b>-0.9591</b> | 0.0544         | -0.0459        | -0.0998        |
| t6C18:1               | <b>-0.8110</b> | 0.1685         | 0.0041         | -0.3166        |
| c13C18:1              | <b>-0.9182</b> | 0.0416         | 0.1189         | 0.0600         |
| c14C18:1              | <b>-0.6605</b> | -0.2575        | -0.1472        | -0.0447        |
| CT                    | <b>-0.8509</b> | 0.0221         | -0.2905        | -0.2343        |
| ttt                   | <b>-0.9152</b> | 0.1119         | 0.0646         | 0.0577         |
| ttc/ctt               | <b>-0.7286</b> | -0.0931        | -0.1197        | -0.0806        |
| cct                   | <b>-0.8975</b> | -0.0489        | 0.1578         | 0.1896         |
| c6c9c12C18:3          | <b>-0.9529</b> | 0.1553         | 0.1197         | -0.0450        |
| c9C20:1               | <b>-0.9506</b> | 0.1651         | 0.1343         | -0.0672        |
| ttCLA                 | <b>-0.9553</b> | 0.0256         | -0.0686        | -0.0641        |
| c5c8c11c14C20:4       | <b>-0.8747</b> | -0.0371        | -0.3004        | -0.1352        |
| C22:0                 | <b>-0.9235</b> | 0.0686         | 0.0982         | 0.0474         |
| c4c7c10c13c16c19C22:6 | <b>-0.8704</b> | -0.0132        | -0.2954        | -0.2013        |
| C20:0                 | -0.1433        | <b>-0.7744</b> | 0.1066         | -0.1340        |
| Sum FA                | -0.3646        | <b>-0.7096</b> | 0.2066         | -0.1663        |
| C11:0                 | -0.1260        | <b>-0.7383</b> | 0.1156         | -0.0394        |
| 2,6,10,14-methylC15:0 | -0.1888        | <b>-0.6412</b> | 0.1928         | -0.1415        |
| 3,7,11,15-methylC16:0 | -0.4377        | <b>-0.6776</b> | 0.1538         | -0.1155        |
| c8c11c14C20:3         | -0.5112        | -0.2945        | <b>-0.7357</b> | -0.0530        |
| tt                    | -0.4523        | -0.2231        | <b>-0.7531</b> | -0.1615        |
| ct                    | -0.4685        | 0.3054         | -0.1660        | <b>0.6192</b>  |
| C8:0                  | 0.3465         | -0.2850        | 0.2256         | <b>-0.6343</b> |

CFA—Conjugated fatty acids, CD—Conjugated dienes, CT—Conjugated trienes, *c*—*cis*, *t*—*trans*, *i*—*iso*-, *a*—*anteiso*, SFA—Saturated fatty acids, MUFA—Monounsaturated fatty acids, PUFA—Polyunsaturated fatty acids; the most significant loadings are boldfaced.
